# Supplementary material for: DNA/HSA binding and anticancer properties of pendant acetate bearing mono-nuclear Ni(ii) and bridging acetate bearing di-nuclear Cu(ii) Schiff base complexes: an experimental and molecular docking study
Source: Royal Society of Chemistry journal article supplement (doi:10.1039/d3nj02960c), 2023-01-01
Supplement: d3nj02960c1.pdf [file d3nj02960c1.pdf]

**DNA/HSA binding and anticancer property of pendant acetate bearing mono-nuclear Ni(II) and bridging acetate bearing di-nuclear Cu(II) Schiff base complexes: An experimental and molecular docking exploration**

Biman Ari<sup>a</sup>, Manik Das <sup>a</sup>, Paola Brandao<sup>b</sup>, Somali Mukherjee<sup>c</sup>, Atish Dipankar Jana<sup>d</sup>, Biplob Koley<sup>e</sup>, Soumik Laha <sup>f</sup>, Maidul Islam<sup>g</sup>, Indranil Choudhuri<sup>h</sup>, Nandan Bhattacharya<sup>h</sup>, Bidhan Chandra Samanta<sup>i</sup>, Nitin Chattopadhyay<sup>j\*</sup>, Tithi Maity<sup>a</sup>

<sup>a</sup>Department of Chemistry, Prabhat Kumar College, Contai, Purba Medinipur, West Bengal, 721404, India

<sup>b</sup>Departamento de Quimica/CICEC, Universidade de Aveiro, Aveiro, Portugal

<sup>c</sup>Department of Chemistry, Scottish Church College, 1 & 3 Urquhart Square, Kolkata-700006

<sup>d</sup>Department of Physics, Behala College, Parnarsree, Kolkata, West Bengal, India

<sup>e</sup>Department of Chemistry, Indian Institute of Technology, Kharagpur, West Bengal, India

<sup>f</sup>Indian Institute of Chemical Biology, Jadavpur, Kolkata, West Bengal, India.

<sup>g</sup>Department of Chemistry, Aliah University, Kolkata, West Bengal, India

<sup>h</sup>Department of Biotechnology, Panskura Banamali College, Panskura West Bengal, India.

<sup>i</sup>Department of Chemistry, Mugberia Gangadhar Mahavidyalaya, Purba Medinipur, India

<sup>j</sup>Department of Chemistry, Jadavpur University, Jadavpur, Kolkata, West Bengal, India

Email: [titlipkc2008@gmail.com](mailto:titlipkc2008@gmail.com)

| Sl. No. | Index                                                                                                                                   | Page. No.  |
|---------|-----------------------------------------------------------------------------------------------------------------------------------------|------------|
| 1.      | FTIR spectrum of ligand <b>HL</b> ( <b>Fig. S1</b> )                                                                                    | <b>S3</b>  |
| 2.      | FTIR spectrum of complex <b>1</b> ( <b>Fig. S2</b> )                                                                                    | <b>S3</b>  |
| 3.      | FTIR spectrum of complex <b>2</b> ( <b>Fig. S3</b> )                                                                                    | <b>S4</b>  |
| 4.      | UV spectrum of (a) ligand <b>HL</b> , (b) complex <b>1</b> and (c) complex <b>2</b> in DMSO solvent ( <b>Fig. S4</b> )                  | <b>S4</b>  |
| 5.      | Mass spectrum of ligand <b>HL</b> ( <b>Fig. S5</b> )                                                                                    | <b>S5</b>  |
| 6.      | Mass spectrum of complex <b>1</b> ( <b>Fig. S6</b> )                                                                                    | <b>S5</b>  |
| 7.      | Mass spectrum of complex <b>2</b> ( <b>Fig. S7</b> )                                                                                    | <b>S6</b>  |
| 8.      | Self-assembly of Cu(II) units in the <i>ab</i> -plane in complex <b>2</b> ( <b>Fig. S8</b> )                                            | <b>S6</b>  |
| 9.      | Absorbance of (a) Complex <b>1</b> and (b) Complex <b>2</b> in buffer medium at working pH 7.4 as a function of time ( <b>Fig. S9</b> ) | <b>S7</b>  |
| 10.     | Absorbance change due to dilution effect of a) complex <b>1</b> b) complex <b>2</b> ( <b>Fig. S10</b> )                                 | <b>S7</b>  |
| 11.     | Cell viability of HeLa cell line after incubation with cisplatin via dose-dependent manner for 24 hrs. ( <b>Fig. S11</b> )              | <b>S8</b>  |
| 12.     | Change of absorbance of (a) complex <b>1</b> and (b) complex <b>2</b> in cell solution ( <b>Fig. S12</b> )                              | <b>S8</b>  |
| 13.     | Theoretical and measured FTIR spectral data of complex <b>1</b> and <b>2</b> ( <b>Table S1</b> )                                        | <b>S9</b>  |
| 14.     | Bond Distances(Å) and Bond Angles (°) for complex <b>1</b> ( <b>Table S2</b> )                                                          | <b>S9</b>  |
| 15.     | C-H $\cdots\pi$ and $\pi\cdots\pi$ interaction parameters for complex <b>1</b> ( <b>Table S3</b> )                                      | <b>S9</b>  |
| 16.     | Hydrogen Bonding parameters for complex <b>1</b> ( <b>Table S4</b> )                                                                    | <b>S10</b> |
| 17.     | Bond Distances(Å) and Bond Angles (°) for complex <b>2</b> ( <b>Table S5</b> )                                                          | <b>S10</b> |
| 18.     | Hydrogen Bonding parameters for complex <b>2</b> ( <b>Table S6</b> )                                                                    | <b>S10</b> |
| 19.     | $\pi\cdots\pi$ interaction parameters for complex <b>2</b> ( <b>Table S7</b> )                                                          | <b>S11</b> |
| 20.     | The binding constant values of DNA with some complexes reported in literature ( <b>Table S8</b> )                                       | <b>S11</b> |
| 21.     | Binding score for the binding of complex <b>1</b> at DNA minor groove                                                                   | <b>S12</b> |
| 22.     | Binding score for the binding of complex <b>1</b> at DNA intercalator ( <b>Table S9</b> )                                               | <b>S13</b> |
| 23.     | Binding score for the binding of complex <b>2</b> at DNA minor groove ( <b>Table S11</b> )                                              | <b>S14</b> |
| 24.     | Binding score for the binding of complex <b>1</b> with HSA ( <b>Table S12</b> )                                                         | <b>S15</b> |
| 25.     | Binding score for the binding of complex <b>1</b> with HSA ( <b>Table S12</b> )                                                         | <b>S16</b> |

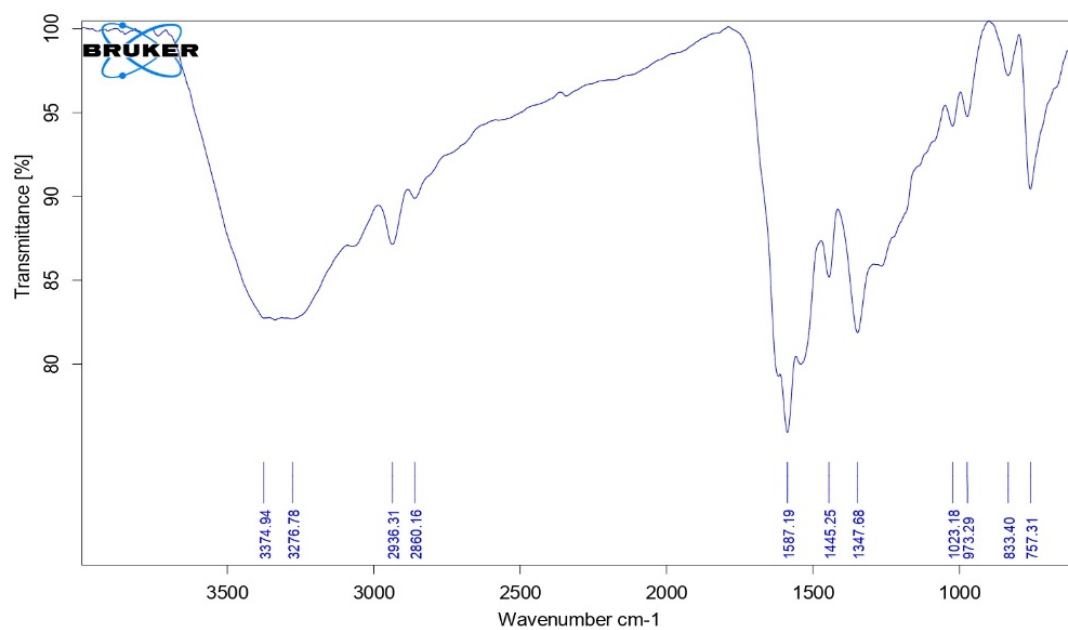

**Fig. S1:** FTIR spectrum of ligand **HL**

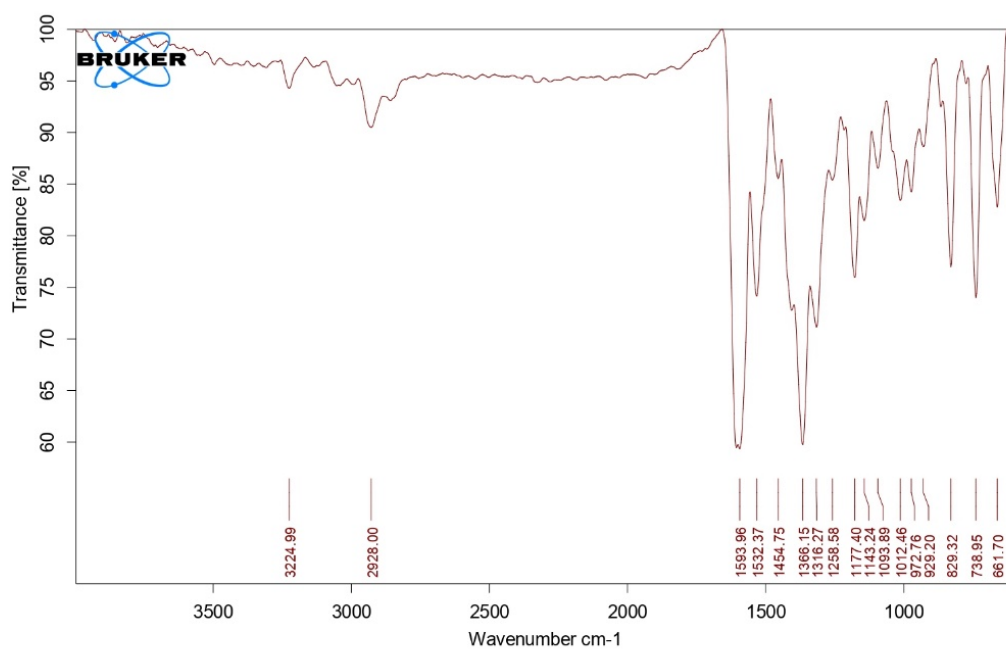

**Fig. S2:** FTIR spectrum of Complex **1**

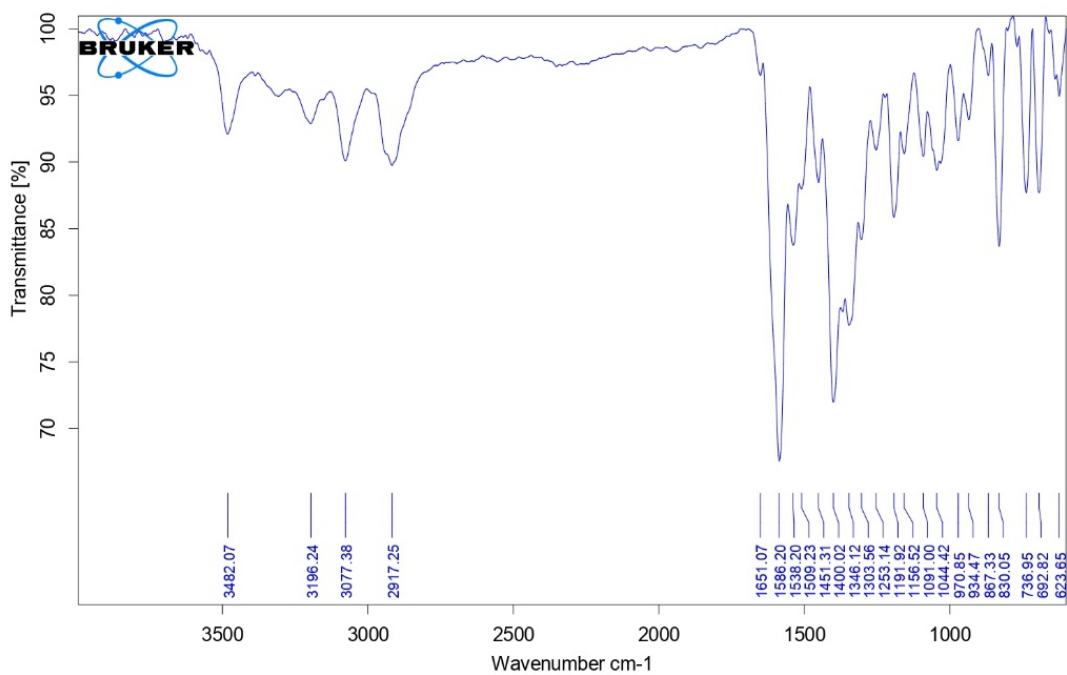

**Fig. S3:** FTIR spectrum of Complex 2

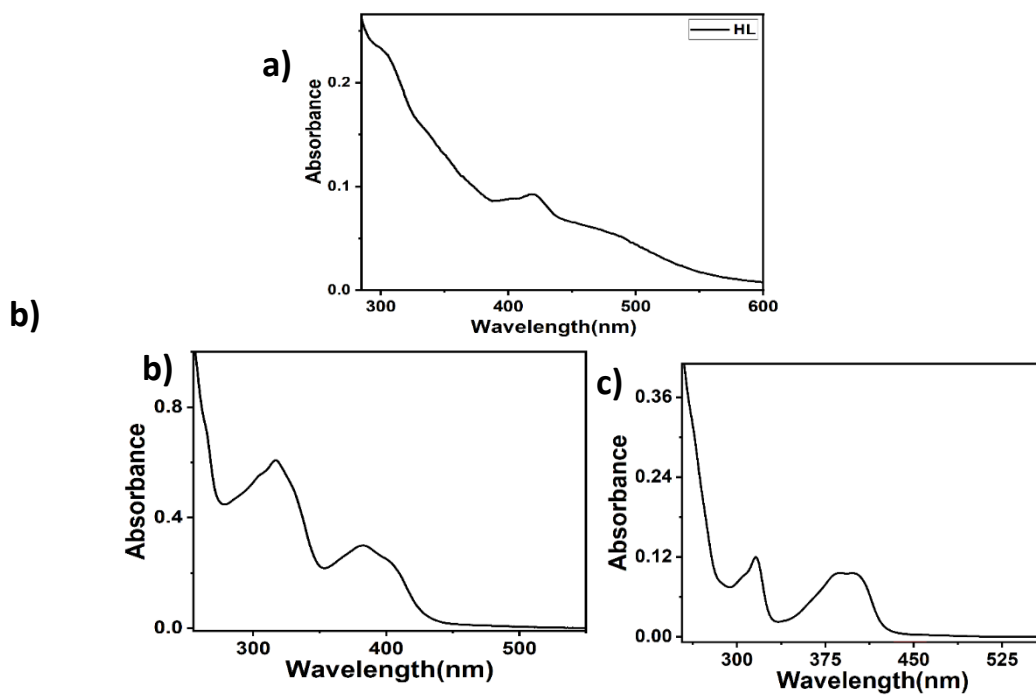

**Fig. S4:** UV spectra of (a) ligand HL, (b) complex 1 and (c) complex 2 in DMSO solvent.

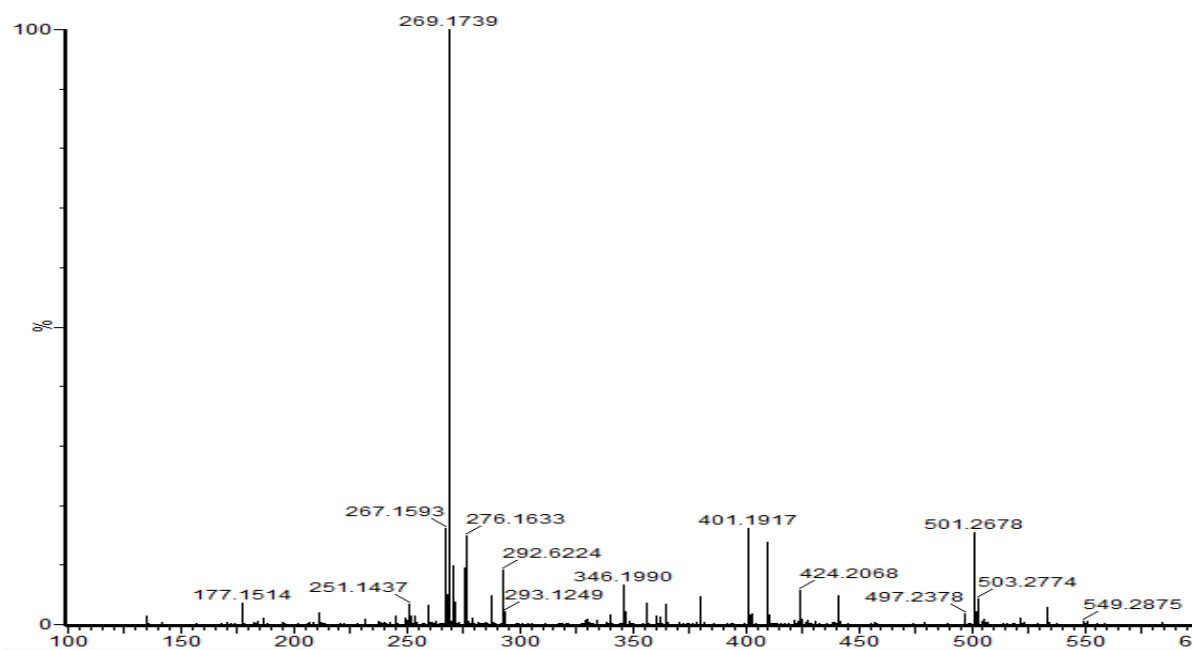

Fig. S5: Mass spectrum of ligand HL

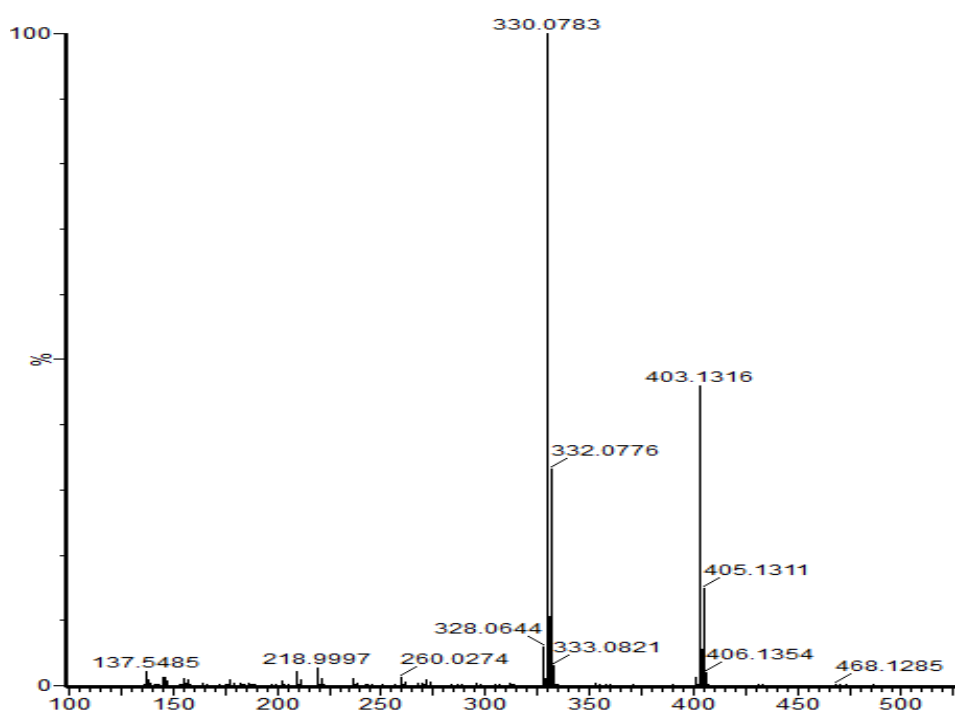

Fig. S6: Mass spectrum of Complex 1

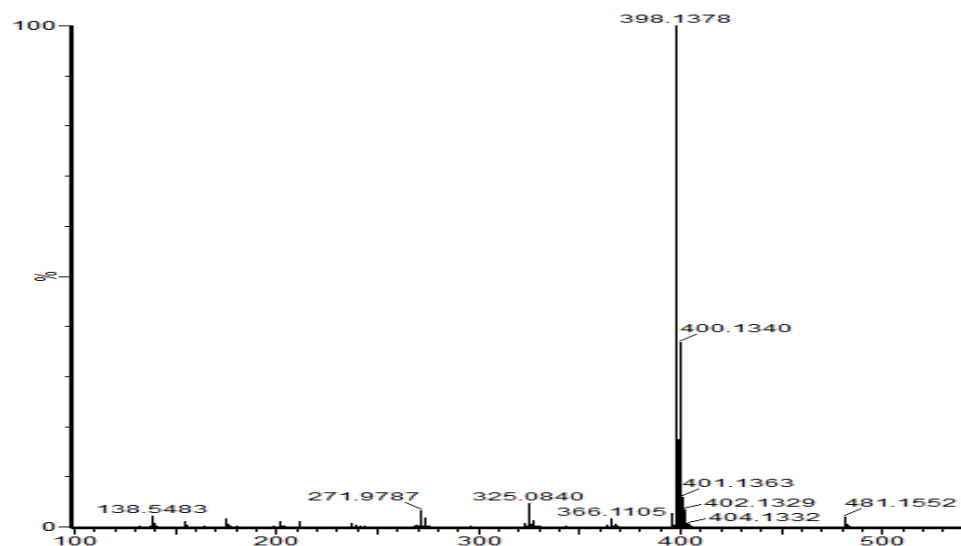

**Fig. S7:** Mass spectrum of Complex 2

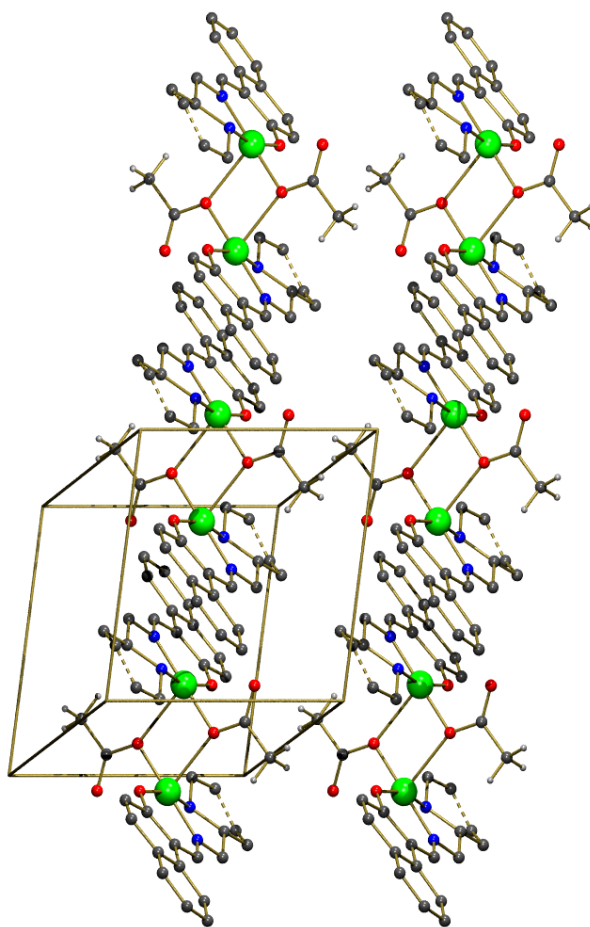

**Fig. S8:** The self-assembly of the Cu(II) units in the *ab*-plane in complex 2.

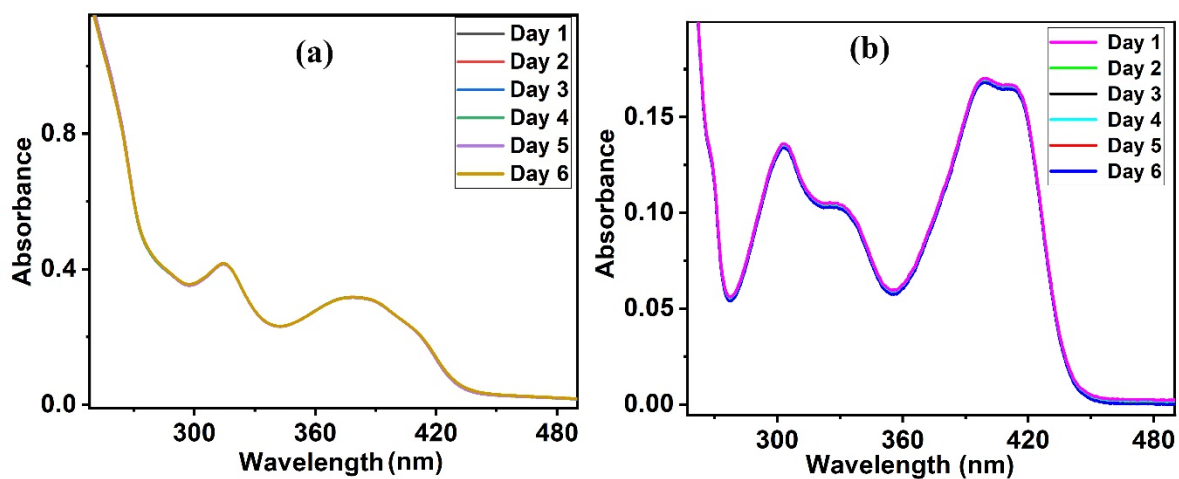

Fig. S9: (a) Change of absorbance of Complex 1 and (b) Complex 2 in buffer medium at working pH 7.4 as a function of time.

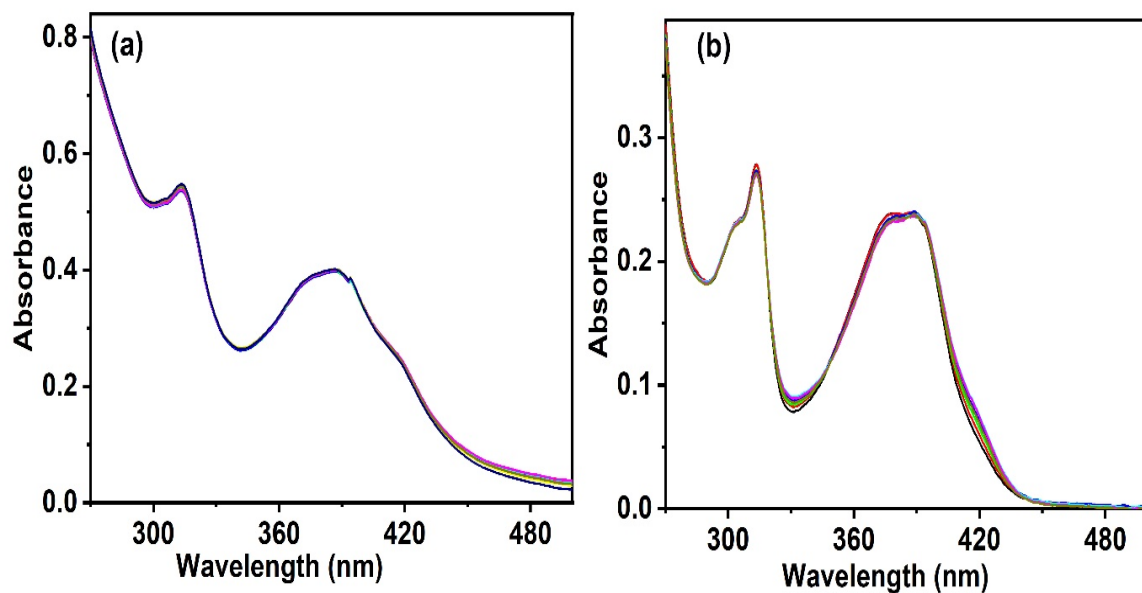

Fig. S10: Absorbance change due to dilution effect of a) complex 1 b) complex 2

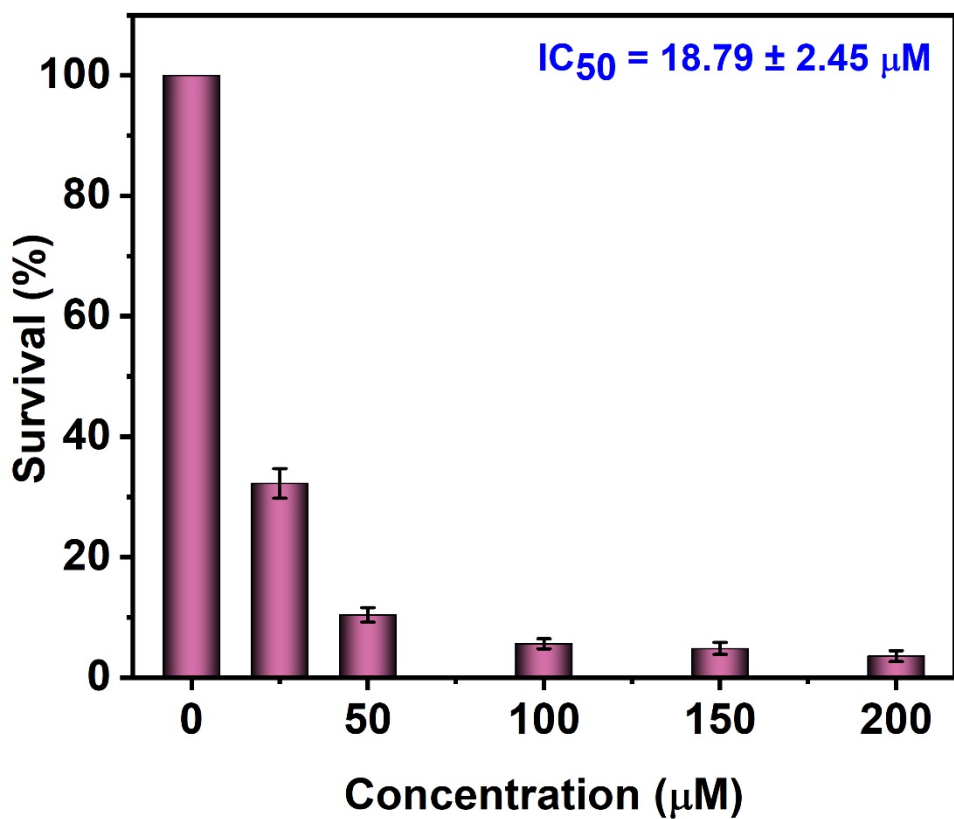

Fig. S11: Cell viability of HeLa cell line after incubation with cisplatin via dose-dependent manner for 24 hrs.

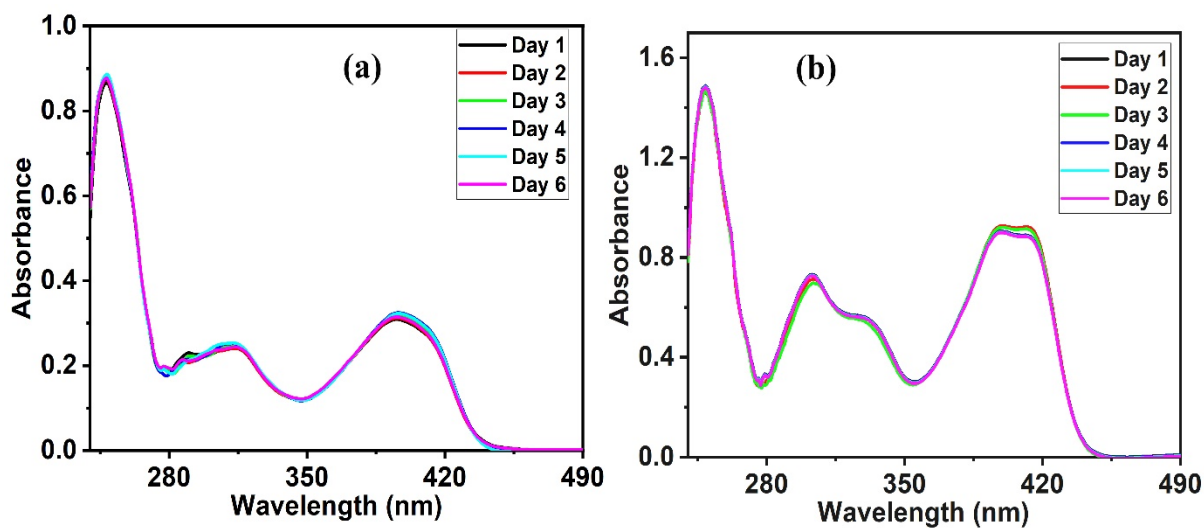

Fig. S12: (a) Change of absorbance of Complex 1 and (b) Complex 2 in cell culture solution.



**Table S1:** Simulated IR and Experimental FTIR spectral data of complex 1 and 2

| <b>Complex 1</b>                      |            |            |            |                       |                        |                                |                          |
|---------------------------------------|------------|------------|------------|-----------------------|------------------------|--------------------------------|--------------------------|
|                                       | <b>C=N</b> | <b>C=O</b> | <b>C=C</b> | <b>Aromatic C – H</b> | <b>Aliphatic C – H</b> | <b>Aromatic ring vibration</b> | <b>Ni – O stretching</b> |
| <b>Simulated (cm<sup>-1</sup>)</b>    | 1629       | 1562       | 1592       | 3225                  | 3031                   | 1492                           | 907                      |
| <b>Experimental (cm<sup>-1</sup>)</b> | 1593       | 1532       | 1594       | 3224                  | 3057                   | 1457                           | 929                      |
| <b>Complex 2</b>                      |            |            |            |                       |                        |                                |                          |
|                                       | <b>C=N</b> | <b>C=O</b> | <b>C=C</b> | <b>Aromatic C – H</b> | <b>Aliphatic C – H</b> | <b>Aromatic ring vibration</b> | <b>Cu – O stretching</b> |
| <b>Simulated (cm<sup>-1</sup>)</b>    | 1649       | 1564       | 1678       | 3207                  | 3034                   | 1489                           | 910                      |
| <b>Experimental (cm<sup>-1</sup>)</b> | 1586       | 1538       | 1651       | 3196                  | 3072                   | 1509                           | 934                      |

| <b>Bond Distances</b> |            |             |            |
|-----------------------|------------|-------------|------------|
| Ni1 -O1               | 1.8429(11) | Ni1 -N1     | 1.8392(11) |
| Ni1 -O2               | 1.8811(11) | Ni1 -N2     | 1.9223(11) |
| <b>Bond Angles</b>    |            |             |            |
| O1 -Ni1 -O2           | 87.68(5)   | O2 -Ni1 -N1 | 175.36(5)  |
| O1 -Ni1 -N1           | 93.94(5)   | O2 -Ni1 -N2 | 92.69 (5)  |
| O1 -Ni1 -N2           | 177.03(5)  | N1 -Ni1 -N2 | 85.48(5)   |

**Table S2:** Bond Distances(Å) and Bond Angles (°) for complex 1**Table S3:** C-H $\cdots$  $\pi$  and  $\pi\cdots\pi$  interaction parameters for complex 1

| Y-X-Cg(i)                                           | Symmetry         | X-Cg(j)   | gamma     |
|-----------------------------------------------------|------------------|-----------|-----------|
| C13-H13 $\cdots$ Cg2                                | 3/2-x,1/2-y, 1-z | 2.546(14) | 155.8(14) |
| C15-H15B $\cdots$ Cg4                               | 3/2-x,1/2-y, 1-z | 2.82      | 152       |
| C15-H15B $\cdots$ Cg6                               | 3/2-x,1/2-y, 1-z | 2.89      | 176       |
| Cg2: Ni1-O1-C1-C10-C11-N1 (six member chelate ring) |                  |           |           |
| Cg4: C1-C2-C3-C4-C9-C10                             |                  |           |           |
| Cg6: C4-C5-C6-C7-C8-C9                              |                  |           |           |

| Cg(i)-Cg(j)            | Symmetry      | distance Cg(i)-Cg(j) | $\alpha$ (dihedral angle) | $\beta$ (slip angle) | dist_perp i-j | dist_perp j-i |
|------------------------|---------------|----------------------|---------------------------|----------------------|---------------|---------------|
| Cg5 $\cdots$ Cg5       | 1-x, y, 3/2-z | 4.4536(13)           | 4.68(11)                  | 23.6                 | 4.0816(10)    | 4.0815(10)    |
| Cg5: C4-C5-C6-C7-C8-C9 |               |                      |                           |                      |               |               |

**Table S4:** Hydrogen Bonding parameters for complex 1

| D-H...A         | D-H(Å)  | H-A(Å)  | D-A(Å)     | <D-H...A(°) | symmetry           |
|-----------------|---------|---------|------------|-------------|--------------------|
| N2 ...H2...O100 | 1.0000  | 1.8600  | 2.8611(16) | 175.00      | x,1-y,1/2+z        |
| O100-H10A...O1  | 0.76(3) | 2.21(3) | 2.9366(18) | 163(3)      | 3/2-x,3/2-y,1-z    |
| O100-H10B...O3  | 0.79(3) | 1.93(3) | 2.7234(18) | 179(4)      | .                  |
| C2-H2...O100    | 0.9500  | 2.5600  | 3.321(2)   | 137.00      | 3/2-x,3/2-y,1-z    |
| C12-H12A...O3   | 0.9900  | 2.4100  | 3.3343(19) | 154.00      | 3/2-x,1/2-y,1-z    |
| C12-H12B...O2   | 0.9900  | 2.5200  | 3.3267(18) | 139.00      | 3/2-x,-1/2+y,3/2-z |
| C17-H17A...O2   | 0.9900  | 2.4900  | 2.9193(18) | 106.00      | .                  |

**Table S5:** Bond Distances(Å) and Bond Angles (°) for complex 2

| <b>Bond Distances</b> |            |               |            |
|-----------------------|------------|---------------|------------|
| Cu1 -O1               | 1.9169(15) | Cu1 -O3       | 2.8205(18) |
| Cu1 -O2               | 1.9561(16) | Cu1 -N1       | 1.9381(18) |
| Cu1 -O2_a             | 2.5157(16) | Cu1 -N2       | 2.097(4)   |
| <b>Bond Angles</b>    |            |               |            |
| O1 -Cu1 -O2           | 90.14(7)   | O2 -Cu1 -N2A  | 95.78(16)  |
| O1 -Cu1 -O3           | 90.68(6)   | O2 -Cu1 -O2_a | 78.13(6)   |
| O1 -Cu1 -N1           | 90.84(7)   | O3 -Cu1 -N1   | 127.74(7)  |
| O1 -Cu1 -N2           | 164.76(11) | O3 -Cu1 -N2   | 81.78(10)  |
| O1 -Cu1 -N2A          | 172.33(15) | O3 -Cu1 -N2A  | 96.81(15)  |
| O1 -Cu1 -O2_a         | 97.89(6)   | O2_a -Cu1 -O3 | 129.17(5)  |
| O2 -Cu1 -O3           | 51.72(6)   | N1 -Cu1 -N2   | 83.48(11)  |
| O2 -Cu1 -N1           | 178.89(7)  | N1 -Cu1 -N2A  | 83.29(16)  |
| O2 -Cu1 -N2           | 95.45(11)  | O2_a -Cu1 -N1 | 102.25(6)  |
| O2_a -Cu1 -N2A        | 78.64(15)  | O2_a -Cu1 -N2 | 97.13(10)  |

Symmetry code: a= 1-x,-y,1-z

**Table S6:** Hydrogen Bonding parameters for complex 2

| D-H...A       | D-H(Å) | H-A(Å) | D-A(Å)    | <D-H...A(°) | symmetry    |
|---------------|--------|--------|-----------|-------------|-------------|
| C11-H11...O3  | 0.9500 | 2.5100 | 3.311(3)  | 142.00      | 1-x,1-y,1-z |
| C17-H17D...O1 | 0.9900 | 2.4800 | 3.305(11) | 140.00      | 1-x,-y,1-z  |

**Table S7:**  $\pi \cdots \pi$  interaction parameters for complex 2

| Cg(i)-<br>Cg(j)                                   | Symmetry         | distance<br>Cg(i)-<br>Cg(j) | $\alpha$<br>(dihedral<br>angle) | $\beta$<br>(slipangle) | dist_perp i-j | dist_perp j-i |
|---------------------------------------------------|------------------|-----------------------------|---------------------------------|------------------------|---------------|---------------|
| Cg1...Cg2                                         | 1-x, 1-y, -<br>z | 3.9803(16)                  | 3.12(12)                        | 27.8                   | 3.5600(10)    | 3.5222(11)    |
| Cg2...Cg2                                         | 1-x, 1-y, -<br>z | 3.8024(17)                  | 0.00(13)                        | 22.5                   | 3.5117(11)    | 3.5117(11)    |
| Cg1: C1-C2-C3-C4-C9-C10<br>Cg2: C4-C5-C6-C7-C8-C9 |                  |                             |                                 |                        |               |               |

**Table S8:** Binding constant values of DNA with some complexes reported in literature

| Complex                                                                                                             | DNA Binding Constant                              | Reference |
|---------------------------------------------------------------------------------------------------------------------|---------------------------------------------------|-----------|
| 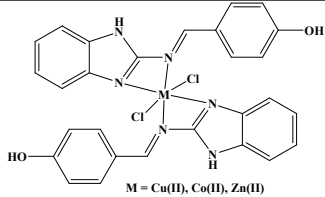 <p>M = Cu(II), Co(II), Zn(II)</p> | $7.85 \times 10^3 \text{ (M}^{-1}\text{)}$        | 01        |
|  <p>X = F, Cl, Br, I</p>           | $6.00 - 7.18 \times 10^3 \text{ (M}^{-1}\text{)}$ | 02        |
|                                    | $3.1 \times 10^4 \text{ (M}^{-1}\text{)}$         | 03        |
|                                   | $1.11 \times 10^3 \text{ (M}^{-1}\text{)}$        | 04        |
|                                  | $1.5 \times 10^3 \text{ (M}^{-1}\text{)}$         | 05        |

## References

1. M. Chaurasia, D. Tomar and S. Chandra, *Polyhedron*, 2019, **1179**, 431 – 442.
2. H. Kargar, R. B. Ardakani, V. Torabi, M. Kashani, Z. C. Natanzi, Z. Kazemi, V. Mirkhani, A. Sahraei, M. N. Tahir, M. Ashfaq and K. S. Munawar, *Polyhedron*, 2021, **195**, 114988.
3. K. Mahmood, W. Hashmi, H. Ismail, B. Mirza, B. Twamley, Z. Akhter, I. Rozas and R. J. Baker, *Polyhedron*, 2019, **157**, 326 – 334.
4. R. Fekri, M. Salehi, A. Asadi and M. Kubicki, *Appl Organometal Chem.* 2017, **e4019**, <https://doi.org/10.1002/aoc.4019>.

5. G. S. Kurdekar, S. M. Puttanagouda, N. V. Kulkarni, S. Budagumpi, V. K. Revankar, Med. Chem. Res., **2011**, **20**, 421 – 429.

**Table S9:** Binding score for the binding of complex **1** at DNA minor groove

| Binding Score | rmsd      | E_conf     | E_place    | E_score1   |
|---------------|-----------|------------|------------|------------|
| -9.5594101    | 10.488411 | 0          | -29.258413 | -9.5594101 |
| -9.3701439    | 8.7533636 | 0.56503946 | -47.719463 | -9.3701439 |
| -11.047505    | 8.308754  | 0          | -27.411764 | -11.047505 |
| -9.3415585    | 8.2763529 | 0          | -7.357955  | -9.3415585 |
| -9.8312378    | 8.2362041 | 0          | -15.60262  | -9.8312378 |
| -9.8041391    | 8.0928917 | 0          | -27.926329 | -9.8041391 |
| -10.428911    | 8.0422945 | 0          | -31.261625 | -10.428911 |
| -9.8156738    | 7.9198937 | 0          | -24.408472 | -9.8156738 |
| -9.2146139    | 7.8929663 | 0          | -18.989803 | -9.2146139 |
| -9.5606594    | 7.8854451 | 0          | -20.897652 | -9.5606594 |
| -9.4773407    | 7.8655391 | 0          | -16.60873  | -9.4773407 |
| -10.65127     | 6.946672  | 0          | -36.728935 | -10.65127  |
| -10.579386    | 6.9138622 | 0          | -6.9834809 | -10.579386 |
| -9.8165855    | 6.7983298 | 0          | -24.772211 | -9.8165855 |
| -9.7815619    | 6.7819691 | 0          | -23.173199 | -9.7815619 |
| -10.466742    | 6.7427049 | 0          | -35.744019 | -10.466742 |
| -10.014174    | 6.725348  | 0          | -26.426285 | -10.014174 |
| -9.3460083    | 6.7120452 | 0.56503946 | -6.9501171 | -9.3460083 |
| -9.8219976    | 6.7046294 | 0.56503946 | -45.995399 | -9.8219976 |
| -9.4139929    | 5.9468622 | 0          | -22.850506 | -9.4139929 |
| -10.464808    | 5.7475972 | 0          | -45.201443 | -10.464808 |
| -9.1699371    | 5.2748322 | 0          | -40.907139 | -9.1699371 |
| -10.239324    | 4.826117  | 0          | -42.504494 | -10.239324 |
| -9.5261583    | 4.8025103 | 0.56503946 | -37.755032 | -9.5261583 |
| -9.9426317    | 4.6285958 | 0          | -7.988975  | -9.9426317 |
| -9.8561363    | 3.461     | 0          | -33.452847 | -9.8561363 |
| -9.8886337    | 2.8937013 | 0          | -31.809496 | -9.8886337 |
| -9.2372942    | 2.3774436 | 0          | -10.461962 | -9.2372942 |

**Table S10:** Binding score for the binding of complex **1** at DNA intercalation

| <b>Binding Score</b> | <b>rmsd</b> | <b>E_conf</b> | <b>E_place</b> | <b>E_score1</b> |
|----------------------|-------------|---------------|----------------|-----------------|
| -9.1757507           | 6.8858218   | 0             | -34.289497     | -9.1757507      |
| -9.0425463           | 6.7221174   | 0             | -24.589159     | -9.0425463      |
| -8.6169291           | 6.5470996   | 0.32843167    | -18.139566     | -8.6169291      |
| -8.7210093           | 6.1920862   | 0.32843167    | -22.023687     | -8.7210093      |
| -9.3036423           | 6.1247444   | 0.32843167    | -48.945301     | -9.3036423      |
| -8.9104614           | 6.0980945   | 0.97340041    | -47.2509       | -8.9104614      |
| -8.6550436           | 6.0806723   | 0             | -36.34576      | -8.6550436      |
| -8.413003            | 5.7562723   | 0.97340041    | -56.554913     | -8.413003       |
| -9.3407478           | 5.7073784   | 0.32843167    | -41.32272      | -9.3407478      |
| -9.0992947           | 5.4279003   | 0.32843167    | -31.327869     | -9.0992947      |
| -8.5718279           | 5.402513    | 0.3221418     | -31.888582     | -8.5718279      |
| -8.4810715           | 5.3780131   | 0.32843167    | -51.250965     | -8.4810715      |
| -8.825263            | 5.3610024   | 0             | -47.116901     | -8.825263       |
| -8.9347849           | 5.3297706   | 0.32843167    | -22.10146      | -8.9347849      |
| -9.7532206           | 5.2968497   | 0.32843167    | -27.016434     | -9.7532206      |
| -10.131186           | 5.2389417   | 0.32843167    | -28.474257     | -10.131186      |
| -10.304563           | 5.1329727   | 0.3221418     | -43.593754     | -10.304563      |
| -9.633791            | 5.0156713   | 0.3221418     | -31.751921     | -9.633791       |
| -10.941286           | 4.9775343   | 0.3221418     | -18.050821     | -10.941286      |
| -8.6640491           | 4.966023    | 0.97340041    | -45.04789      | -8.6640491      |
| -8.6922283           | 4.9561458   | 0.97340041    | -44.111336     | -8.6922283      |
| -9.5288811           | 4.9195657   | 0.97340041    | -58.275349     | -9.5288811      |
| -9.0856762           | 4.7829452   | 0.32843167    | -17.636602     | -9.0856762      |
| -9.4218464           | 4.7116346   | 0.97340041    | -47.845276     | -9.4218464      |
| -8.527462            | 4.6860142   | 0             | -51.589344     | -8.527462       |
| -9.2608871           | 4.6169739   | 0.3221418     | -37.966972     | -9.2608871      |
| -9.0271673           | 4.5675316   | 0             | -33.014801     | -9.0271673      |
| -10.6928072          | 3.8527055   | 0.97340041    | -23.840168     | -9.6928072      |
| -10.3216566          | 2.7877915   | 0.3221418     | -27.826639     | -9.4616566      |

**Table S11:** Binding score for the binding of complex **2** at DNA minor groove

| <b>Binding Score</b> | <b>rmsd</b> | <b>E_conf</b> | <b>E_place</b> | <b>E_score1</b> |
|----------------------|-------------|---------------|----------------|-----------------|
| -5.1857719           | 11.436229   | 0             | 97.250511      | -5.1857719      |
| -5.139678            | 9.0602036   | 0             | 174.02473      | -5.139678       |
| -7.2216291           | 9.0462446   | 0             | 66.290627      | -7.2216291      |
| -5.8535321           | 8.8219395   | 0             | 119.60373      | -3.8535321      |
| -4.6029191           | 8.7690754   | 0             | 71.073364      | -4.6029191      |
| -4.8598709           | 8.5990124   | 0             | 93.622353      | -4.8598709      |
| -5.4226975           | 8.3615885   | 0             | 106.24297      | -5.4226975      |
| -5.8418376           | 8.0120306   | 0             | 354.67075      | -3.8418376      |
| -4.0858569           | 7.8855586   | 0             | 126.70719      | -4.0858569      |
| -7.9352536           | 7.7861276   | 0             | 122.00208      | -7.9352536      |
| -7.4254193           | 7.5623584   | 0             | 70.892532      | -7.4254193      |
| -6.270031            | 7.3722315   | 0             | 111.62238      | -6.270031       |
| -4.0475793           | 7.2914929   | 0             | 314.2995       | -4.0475793      |
| -6.6081805           | 7.1947985   | 0             | 100.29273      | -6.6081805      |
| -5.6007333           | 7.1145511   | 0             | 92.111107      | -5.6007333      |
| -8.632472            | 7.0933418   | 0             | 60.790539      | -9.632472       |
| -8.1107388           | 7.0303464   | 0             | 50.607258      | -9.1107388      |
| -7.4566426           | 7.004076    | 0             | 90.704697      | -7.4566426      |
| -4.6959662           | 6.6617689   | 0             | 158.55688      | -4.6959662      |
| -4.2632871           | 6.3792753   | 0             | 31.003098      | -4.2632871      |
| -6.4156265           | 6.1319251   | 0             | 42.936256      | -6.4156265      |
| -4.0423818           | 6.0040855   | 0             | 105.14465      | -4.0423818      |
| -5.4528904           | 5.0807004   | 0             | 92.31765       | -5.4528904      |
| -6.1066651           | 4.8778548   | 0             | 51.703781      | -6.1066651      |
| -6.6465163           | 4.1891012   | 0             | 68.526207      | -6.6465163      |
| -4.751729            | 4.013875    | 0             | 120.81822      | -4.751729       |
| -4.6030588           | 3.1987524   | 0             | 68.977112      | -4.6030588      |
| -4.7474484           | 2.262897    | 0             | 133.01314      | -4.7474484      |
| -6.39643             | 1.6939558   | 0             | 96.033363      | -6.39643        |
| -8.957859            | 1.1584539   | 0             | -7.1701484     | -10.957859      |

**Table S12:** Binding score for the binding of complex **1** with HSA

| <b>Binding Score</b> | <b>rmsd</b> | <b>E_conf</b> | <b>E_place</b> | <b>E_score1</b> |
|----------------------|-------------|---------------|----------------|-----------------|
| -10.720331           | 6.67345     | 0             | -47.032963     | -10.720331      |
| -10.787185           | 5.811023    | 0             | -45.286308     | -10.787185      |
| -12.026942           | 5.675232    | 0             | -63.61377      | -12.026942      |
| -12.715164           | 5.674405    | 0             | -65.97805      | -12.715164      |
| -12.788953           | 5.603033    | 0.5635969     | -46.79921      | -12.788953      |
| -10.845725           | 5.505134    | 0             | -76.004616     | -10.845725      |
| -11.580856           | 5.485235    | 0             | -45.145054     | -11.580856      |
| -11.688602           | 5.37348     | 0             | -55.357204     | -11.688602      |
| -13.18986            | 5.312163    | 0             | -58.681335     | -13.18986       |
| -11.404141           | 5.203543    | 0             | -54.618889     | -11.404141      |
| -12.929245           | 5.176729    | 0.5635969     | -62.868744     | -12.929245      |
| -13.142697           | 5.154055    | 0             | -47.367599     | -13.142697      |
| -11.091172           | 5.124368    | 0             | -50.175652     | -11.091172      |
| -11.63429            | 5.092594    | 0.5635969     | -54.403316     | -11.63429       |
| -10.69925            | 5.087902    | 0.5635969     | -50.38768      | -10.69925       |
| -12.331975           | 5.08509     | 0.5635969     | -50.138313     | -12.331975      |
| -11.666287           | 5.027835    | 0.5635969     | -46.188126     | -11.666287      |
| -10.858206           | 5.020379    | 0             | -87.362656     | -10.858206      |
| -10.844515           | 4.9905767   | 0             | -46.777302     | -10.844515      |
| -10.816071           | 4.9540067   | 0             | -50.11031      | -10.816071      |
| -12.291677           | 4.9414034   | 0             | -46.242447     | -12.291677      |
| -10.973258           | 4.8814468   | 0             | -50.420715     | -10.973258      |
| -11.396079           | 4.8300247   | 0             | -61.759968     | -11.396079      |
| -10.692629           | 4.6763783   | 0             | -62.886478     | -10.692629      |
| -10.756347           | 4.6629386   | 0             | -52.436111     | -10.756347      |
| -10.850788           | 4.1815052   | 0             | -75.747627     | -10.850788      |
| -10.673301           | 3.4172621   | 0             | -95.411407     | -10.673301      |
| -10.691599           | 2.6416392   | 0             | -78.054367     | -10.691599      |
| -10.661953           | 2.4864502   | 0             | -57.92662      | -10.661953      |
| -10.850429           | 2.3283477   | 0             | -68.022697     | -10.850429      |



**Table S13:** Binding score for the binding of complex 2 with HSA

| <b>Binding Score</b> | <b>rmsd</b> | <b>E_conf</b> | <b>E_place</b> | <b>E_score1</b> |
|----------------------|-------------|---------------|----------------|-----------------|
| -11.736822           | 9.0072575   | 0             | -75.193123     | -11.736822      |
| -12.607366           | 6.877202    | 0             | -92.89312      | -12.607366      |
| -12.460502           | 6.8224483   | 0             | -40.366917     | -12.460502      |
| -12.405087           | 6.7066588   | 0             | -98.615112     | -12.405087      |
| -12.249303           | 6.5962796   | 0             | -38.848248     | -12.249303      |
| -11.706466           | 6.5779605   | 0             | -88.803383     | -11.706466      |
| -11.963461           | 6.3602362   | 0             | -90.334488     | -11.963461      |
| -12.376112           | 6.330719    | 0             | -78.519203     | -12.376112      |
| -11.547637           | 5.9639521   | 0             | -62.038059     | -11.547637      |
| -11.523037           | 5.7846317   | 0             | -97.570129     | -11.523037      |
| -11.96915            | 5.5169139   | 0             | -56.425022     | -11.96915       |
| -11.987286           | 5.4725761   | 0             | -47.442356     | -11.987286      |
| -11.722466           | 5.4419847   | 0             | -98.97348      | -11.722466      |
| -12.661026           | 5.4403319   | 0             | -88.283401     | -12.661026      |
| -12.639564           | 5.3680415   | 0             | -88.787437     | -12.639564      |
| -12.421879           | 5.3206921   | 0             | -75.478432     | -12.421879      |
| -11.767261           | 5.0970526   | 0             | -72.018806     | -11.767261      |
| -11.588616           | 5.0771875   | 0             | -63.95927      | -11.588616      |
| -12.575379           | 5.0572915   | 0             | -75.965279     | -12.575379      |
| -12.82082            | 4.9196701   | 0             | -71.663315     | -12.82082       |
| -12.224266           | 4.7611771   | 0             | -79.519676     | -12.224266      |
| -12.821813           | 4.7278781   | 0             | -63.884499     | -12.821813      |
| -11.705542           | 4.6552944   | 0             | -58.399265     | -11.705542      |
| -12.842366           | 4.6510158   | 0             | -77.404785     | -12.842366      |
| -11.867752           | 3.6939485   | 0             | -22.880098     | -11.867752      |
| -11.985737           | 3.1135659   | 0             | -66.376793     | -11.985737      |
| -11.803231           | 2.2300398   | 0             | -46.704292     | -11.803231      |
| -12.065418           | 1.7545201   | 0             | -77.391121     | -12.065418      |
| -11.803637           | 1.6245247   | 0             | -43.038303     | -11.803637      |
| -11.51976            | 1.4467862   | 0             | -66.892357     | -11.51976       |
